# Supplementary material for: Deglaciation explains bat extinction in the Caribbean
Source: PubMed Central journal article supplement (PMC3538999; doi:10.1002/ece3.399), 2012-11-06
Supplement: ece30002-3045-SD1.pdf [file ece30002-3045-SD1.pdf]

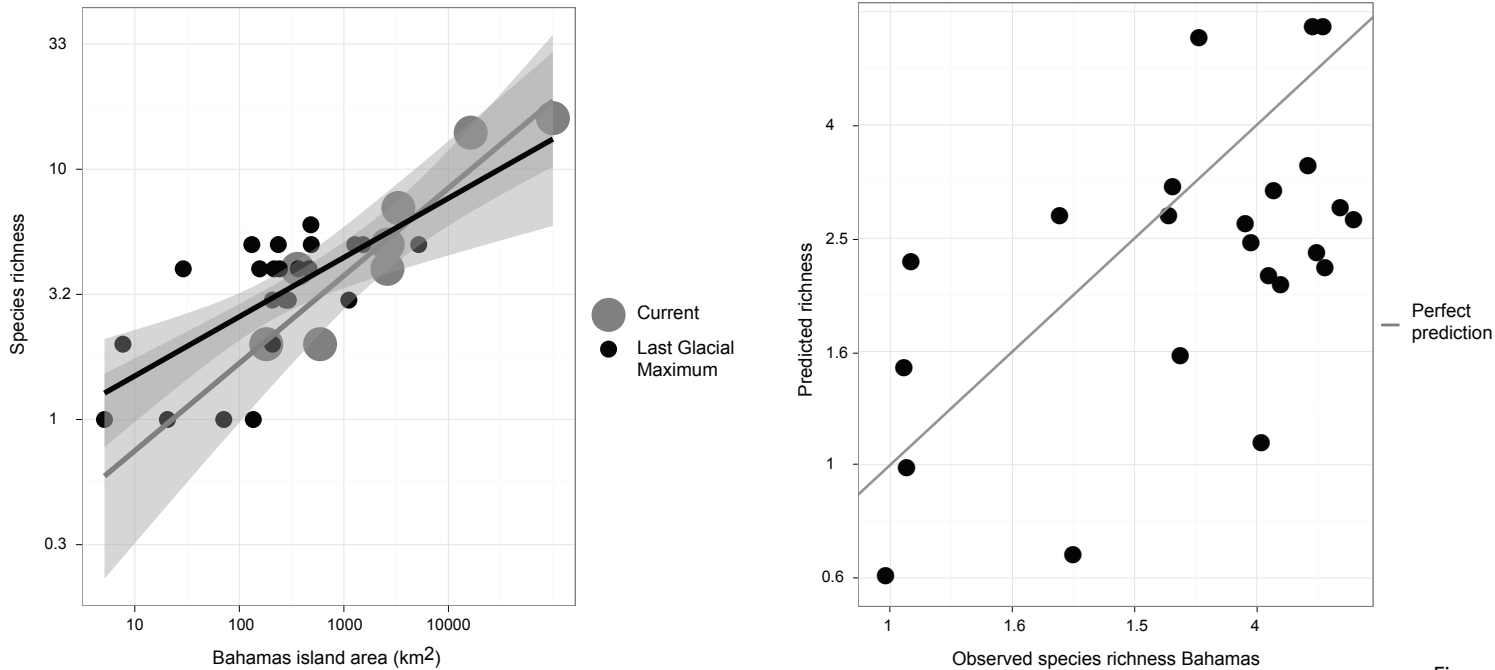

Figure S4
