# Supplementary material for: Deglaciation explains bat extinction in the Caribbean
Source: PubMed Central journal article supplement (PMC3538999; doi:10.1002/ece3.399), 2012-11-06
Supplement: ece30002-3045-SD3.pdf [file ece30002-3045-SD3.pdf]

Supplementary Table 1

| Species                                   | Family         | Endemic to             |             |         |                |                |             |               |              |                |         |            |         |                  |             |              |             |                |              |               |              |
|-------------------------------------------|----------------|------------------------|-------------|---------|----------------|----------------|-------------|---------------|--------------|----------------|---------|------------|---------|------------------|-------------|--------------|-------------|----------------|--------------|---------------|--------------|
|                                           |                | Extinct in West Indies | West Indies | Acklins | Crooked Island | Fortune Island | East Caicos | Middle Caicos | North Caicos | Providenciales | Andros  | Cat Island | Darby   | Eleuthera Island | Great Exuma | Little Exuma | Long Island | New Providence | Great Inagua | Little Inagua | Grand Bahama |
|                                           |                | Bahamas                | Bahamas     | Bahamas | Bahamas        | Bahamas        | Bahamas     | Bahamas       | Bahamas      | Bahamas        | Bahamas | Bahamas    | Bahamas | Bahamas          | Bahamas     | Bahamas      | Bahamas     | Bahamas        | Bahamas      | Bahamas       | Bahamas      |
| <i>Eumops auripendulus</i>                | Molossidae     |                        |             |         |                |                |             |               |              |                |         |            |         |                  |             |              |             |                |              |               |              |
| <i>Eumops glaucinus</i>                   | Molossidae     |                        |             |         |                |                |             |               |              |                |         |            |         |                  |             |              |             |                |              |               |              |
| <i>Eumops perotis</i>                     | Molossidae     |                        |             |         |                |                |             |               |              |                |         |            |         |                  |             |              |             |                |              |               |              |
| <i>Molossus molossus</i>                  | Molossidae     |                        |             |         |                |                |             |               |              |                |         |            |         |                  |             |              |             |                |              |               |              |
| <i>Mormopterus minutus</i>                | Molossidae     |                        | yes         |         |                |                |             |               |              |                |         |            |         |                  |             |              |             |                |              |               |              |
| <i>Nyctinomops laticaudatus</i>           | Molossidae     |                        |             |         |                |                |             |               |              |                |         |            |         |                  |             |              |             |                |              |               |              |
| <i>Nyctinomops macrotis</i>               | Molossidae     |                        |             |         |                |                |             |               |              |                |         |            |         |                  |             |              |             |                |              |               |              |
| <i>Tadarida brasiliensis</i>              | Molossidae     |                        |             | extant  | extant         | extant         |             | extinct       |              |                |         |            | extant  | extant           | extant      | extant       | extinct     |                |              |               |              |
| <i>Mormoops blainvillei</i>               | Mormoopidae    |                        | yes         |         |                |                |             |               |              |                |         |            |         |                  |             |              |             | extinct        |              |               |              |
| <i>Mormoops magna</i>                     | Mormoopidae    | yes                    | yes         |         |                |                |             |               |              |                |         |            |         |                  |             |              |             |                |              |               |              |
| <i>Mormoops megalophylla</i>              | Mormoopidae    | yes                    |             |         |                |                |             |               |              |                | extinct |            |         |                  |             |              |             |                |              |               |              |
| <i>Pteronotus davyi</i>                   | Mormoopidae    |                        |             |         |                |                |             |               |              |                |         |            |         |                  |             |              |             |                |              |               |              |
| <i>Pteronotus macleayi</i>                | Mormoopidae    |                        | yes         |         |                |                |             |               |              |                |         |            |         |                  |             |              |             |                | extinct      |               |              |
| <i>Pteronotus parnellii parnellii</i>     | Mormoopidae    |                        | yes         |         |                |                |             |               |              |                |         |            |         |                  |             |              |             |                | extinct      |               |              |
| <i>Pteronotus parnellii portoricensis</i> | Mormoopidae    |                        | yes         |         |                |                |             |               |              |                |         |            |         |                  |             |              |             |                |              |               |              |
| <i>Pteronotus parnellii pusillus</i>      | Mormoopidae    |                        | yes         |         |                |                |             |               |              |                |         |            |         |                  |             |              |             |                |              |               |              |
| <i>Pteronotus parnellii rubiginosus</i>   | Mormoopidae    |                        |             |         |                |                |             |               |              |                |         |            |         |                  |             |              |             |                |              |               |              |
| <i>Pteronotus pristinus</i>               | Mormoopidae    | yes                    | yes         |         |                |                |             |               |              |                |         |            |         |                  |             |              |             |                |              |               |              |
| <i>Pteronotus quadridens</i>              | Mormoopidae    |                        | yes         |         |                |                |             |               |              |                | extinct |            |         |                  |             |              |             |                | extinct      |               |              |
| <i>Pteronotus sp. nov.</i>                | Mormoopidae    | yes                    | yes         |         |                |                |             |               |              |                |         |            |         |                  |             |              |             |                |              |               |              |
| <i>Chilonatalus micropus macer</i>        | Natalidae      |                        | yes         |         |                |                |             |               |              |                |         |            |         |                  |             |              |             |                |              |               |              |
| <i>Chilonatalus micropus micropus</i>     | Natalidae      |                        | yes         |         |                |                |             |               |              |                |         |            |         |                  |             |              |             |                |              |               |              |
| <i>Chilonatalus tumidifrons</i>           | Natalidae      |                        | yes         |         |                |                |             |               |              |                | extant  | extinct    |         |                  | extinct     |              |             |                | extinct      |               |              |
| <i>Natalus jamaicensis</i>                | Natalidae      |                        | yes         |         |                |                |             |               |              |                |         |            |         |                  |             |              |             |                |              |               |              |
| <i>Natalus major</i>                      | Natalidae      |                        | yes         |         |                |                |             | extinct       |              |                |         |            |         |                  |             |              |             |                |              |               |              |
| <i>Natalus primus</i>                     | Natalidae      | yes                    | yes         |         |                |                |             |               |              |                | extinct |            |         |                  |             |              |             |                | extinct      |               |              |
| <i>Natalus stramineus</i>                 | Natalidae      |                        | yes         |         |                |                |             |               |              |                |         |            |         |                  |             |              |             |                |              |               |              |
| <i>Nyctiellus lepidus</i>                 | Natalidae      |                        | yes         |         |                |                |             |               |              |                | extinct | extant     |         | extant           | extinct     | extant       | extant      |                |              |               |              |
| <i>Noctilio leporinus</i>                 | Noctilionidae  |                        |             |         |                |                |             |               |              |                |         |            |         |                  |             |              |             |                |              | extant        |              |
| <i>Ardops nicholli</i>                    | Phyllostomidae |                        | yes         |         |                |                |             |               |              |                |         |            |         |                  |             |              |             |                |              |               |              |
| <i>Artibeus flavescens</i>                | Phyllostomidae |                        | yes         |         |                |                |             |               |              |                |         |            |         |                  |             |              |             |                |              |               |              |
| <i>Artibeus anthonyi</i>                  | Phyllostomidae | yes                    | yes         |         |                |                |             |               |              |                |         |            |         |                  |             |              |             |                |              |               |              |
| <i>Artibeus jamaicensis</i>               | Phyllostomidae |                        |             |         |                |                |             |               |              | extant         |         |            |         |                  |             |              |             |                | extant       | extant        |              |
| <i>Artibeus lituratus</i>                 | Phyllostomidae |                        |             |         |                |                |             |               |              |                |         |            |         |                  |             |              |             |                |              |               |              |
| <i>Artibeus planirostris</i>              | Phyllostomidae |                        |             |         |                |                |             |               |              |                |         |            |         |                  |             |              |             |                |              |               |              |
| <i>Artibeus schwartzi</i>                 | Phyllostomidae |                        | yes         |         |                |                |             |               |              |                |         |            |         |                  |             |              |             |                |              |               |              |
| <i>Brachyphylla cavernarum</i>            | Phyllostomidae |                        | yes         |         |                |                |             |               |              |                |         |            |         |                  |             |              |             |                |              |               |              |
| <i>Brachyphylla nana nana</i>             | Phyllostomidae |                        | yes         |         |                |                |             |               |              |                | extinct |            |         |                  |             |              |             |                | extinct      |               |              |
| <i>Brachyphylla nana pumila</i>           | Phyllostomidae |                        | yes         |         |                |                |             |               |              |                | extant  |            |         |                  |             |              |             |                |              |               |              |
| <i>Chiroderma improvisum</i>              | Phyllostomidae |                        | yes         |         |                |                |             |               |              |                |         |            |         |                  |             |              |             |                |              |               |              |
| <i>Cubanycteris silvai</i>                | Phyllostomidae | yes                    | yes         |         |                |                |             |               |              |                |         |            |         |                  |             |              |             |                |              |               |              |
| <i>Desmodus puntajudensis</i>             | Phyllostomidae | yes                    | yes         |         |                |                |             |               |              |                |         |            |         |                  |             |              |             |                |              |               |              |
| <i>Erophylla bombifrons</i>               | Phyllostomidae |                        | yes         |         |                |                |             |               |              |                |         |            |         |                  |             |              |             |                |              |               |              |
| <i>Erophylla sezekarni</i>                | Phyllostomidae |                        | yes         | extant  | extant         |                | extant      | extant        | extant       | extant         | extant  | extant     | extant  | extant           | extant      | extant       | extant      | extant         | extant       | extant        | extant       |
| <i>Glossophaga longirostris</i>           | Phyllostomidae |                        |             |         |                |                |             |               |              |                |         |            |         |                  |             |              |             |                |              |               |              |
| <i>Glossophaga soricina</i>               | Phyllostomidae |                        |             |         |                |                |             |               |              |                |         |            |         |                  |             |              |             |                |              |               |              |
| <i>Macrotus waterhousii</i>               | Phyllostomidae |                        | yes         | extant  | extant         |                | extant      | extinct       | extant       | extant         | extant  | extant     | extant  | extant           | extant      | extant       | extant      | extant         | extant       | extant        | extant       |
| <i>Monophyllus plethodon</i>              | Phyllostomidae |                        | yes         |         |                |                |             |               |              |                |         |            |         |                  |             |              |             |                |              |               |              |
| <i>Monophyllus redmani</i>                | Phyllostomidae |                        | yes         | extant  | extant         |                |             | extant        | extant       | extant         | extinct |            |         |                  |             |              |             |                | extinct      |               |              |
| <i>Phyllonycteris aphylla</i>             | Phyllostomidae |                        | yes         |         |                |                |             |               |              |                |         |            |         |                  |             |              |             |                |              |               |              |
| <i>Phyllonycteris major</i>               | Phyllostomidae | yes                    | yes         |         |                |                |             |               |              |                |         |            |         |                  |             |              |             |                |              |               |              |
| <i>Phyllonycteris poeyi</i>               | Phyllostomidae |                        | yes         |         |                |                |             |               |              |                |         |            |         |                  |             |              |             |                | extinct      |               |              |
| <i>Phyllops falcatus</i>                  | Phyllostomidae |                        | yes         |         |                |                |             |               |              |                |         |            |         |                  |             |              |             |                |              |               |              |
| <i>Phyllops silvai</i>                    | Phyllostomidae | yes                    | yes         |         |                |                |             |               |              |                |         |            |         |                  |             |              |             |                |              |               |              |
| <i>Phyllops vetus</i>                     | Phyllostomidae | yes                    | yes         |         |                |                |             |               |              |                |         |            |         |                  |             |              |             |                |              |               |              |
| <i>Stenoderma rufum</i>                   | Phyllostomidae |                        | yes         |         |                |                |             |               |              |                |         |            |         |                  |             |              |             |                |              |               |              |

Supplementary Table 1

| Species                             | Family           | Endemic to  |             | Bahamas |                |                |             |               |              |                |        |            |       |                  |             |              |             |                |              |               |              |        |
|-------------------------------------|------------------|-------------|-------------|---------|----------------|----------------|-------------|---------------|--------------|----------------|--------|------------|-------|------------------|-------------|--------------|-------------|----------------|--------------|---------------|--------------|--------|
|                                     |                  | West Indies | West Indies | Acklins | Crooked Island | Fortune Island | East Caicos | Middle Caicos | North Caicos | Providenciales | Andros | Cat Island | Darby | Eleuthera Island | Great Exuma | Little Exuma | Long Island | New Providence | Great Inagua | Little Inagua | Grand Bahama |        |
| <i>Sturnira lilium</i>              | Phyllostomidae   |             | yes         |         |                |                |             |               |              |                |        |            |       |                  |             |              |             |                |              |               |              |        |
| <i>Sturnira thomasi</i>             | Phyllostomidae   |             | yes         |         |                |                |             |               |              |                |        |            |       |                  |             |              |             |                |              |               |              |        |
| <i>Tonatia saurophila</i>           | Phyllostomidae   | yes         |             |         |                |                |             |               |              |                |        |            |       |                  |             |              |             |                |              |               |              |        |
| <i>Antrozous pallidus</i>           | Vespertilionidae |             |             |         |                |                |             |               |              |                |        |            |       |                  |             |              |             |                |              |               |              |        |
| <i>Eptesicus fuscus</i>             | Vespertilionidae |             |             | extant  | extant         |                |             |               |              | extant         |        |            |       | extant           |             |              | extant      | extant         |              |               |              | extant |
| <i>Eptesicus guadeloupensis</i>     | Vespertilionidae |             | yes         |         |                |                |             |               |              |                |        |            |       |                  |             |              |             |                |              |               |              |        |
| <i>Lasiurus degelidus</i>           | Vespertilionidae |             | yes         |         |                |                |             |               |              |                |        |            |       |                  |             |              |             |                |              |               |              |        |
| <i>Lasiurus insularis</i>           | Vespertilionidae |             | yes         |         |                |                |             |               |              |                |        |            |       |                  |             |              |             |                |              |               |              |        |
| <i>Lasiurus intermedius</i>         | Vespertilionidae |             | yes         |         |                |                |             |               |              |                |        |            |       |                  |             |              |             |                |              |               |              |        |
| <i>Lasiurus minor</i>               | Vespertilionidae |             | yes         |         |                |                |             |               | extant       | extant         | extant |            |       |                  |             |              | extant      | extant         | extant       |               |              | extant |
| <i>Lasiurus pfeifferi</i>           | Vespertilionidae |             | yes         |         |                |                |             |               |              |                |        |            |       |                  |             |              |             |                |              |               |              |        |
| <i>Myotis cf. M. austroriparius</i> | Vespertilionidae | yes         | yes         |         |                |                |             |               |              |                |        |            |       |                  |             |              |             |                |              |               |              |        |
| <i>Myotis dominicensis</i>          | Vespertilionidae |             | yes         |         |                |                |             |               |              |                |        |            |       |                  |             |              |             |                |              |               |              |        |
| <i>Myotis martiniquensis</i>        | Vespertilionidae |             | yes         |         |                |                |             |               |              |                |        |            |       |                  |             |              |             |                |              |               |              |        |
| <i>Nycticeius cubanus</i>           | Vespertilionidae |             | yes         |         |                |                |             |               |              |                |        |            |       |                  |             |              |             |                |              |               |              |        |
| <b>Extant #</b>                     |                  |             |             |         |                |                |             |               |              |                |        |            |       |                  |             |              |             |                |              |               |              |        |
| <b>species</b>                      |                  | 5           | 5           | 1       | 2              | 3              | 3           | 5             | 5            | 4              | 1      | 4          | 4     | 4                | 6           | 4            | 5           | 1              | 3            |               |              |        |
| <b>Extinct #</b>                    |                  |             |             |         |                |                |             |               |              |                |        |            |       |                  |             |              |             |                |              |               |              |        |
| <b>species</b>                      |                  | 0           | 0           | 0       | 0              | 3              | 0           | 0             | 6            | 1              | 0      | 0          | 2     | 1                | 0           | 10           | 0           | 0              | 0            |               |              |        |
| <b>Total</b>                        |                  |             |             |         |                |                |             |               |              |                |        |            |       |                  |             |              |             |                |              |               |              |        |
| <b>species</b>                      |                  | 5           | 5           | 1       | 2              | 6              | 3           | 5             | 11           | 5              | 1      | 4          | 6     | 5                | 6           | 14           | 5           | 1              | 3            |               |              |        |



Supplementary Table 1

| Species                             | Family           | Endemic to  |             | Great Abaco | Little Abaco | Mayaguana | East Cay  | Plana San Salvador | Cayman Brac | Little Cayman | Cuba      | Isle of Pines | Grand Cayman | Hispaniola | Ile de la Gonave | Ile de la Tortue | Jamaica  | Mona     | Navassa  | Anegada  | Culebra   | Guana    | Puerto Rico |          | St. John |
|-------------------------------------|------------------|-------------|-------------|-------------|--------------|-----------|-----------|--------------------|-------------|---------------|-----------|---------------|--------------|------------|------------------|------------------|----------|----------|----------|----------|-----------|----------|-------------|----------|----------|
|                                     |                  | West Indies | West Indies |             |              |           |           |                    |             |               |           |               |              |            |                  |                  |          |          |          |          |           |          | Bahamas     | Bahamas  |          |
| <i>Sturnira liliium</i>             | Phyllostomidae   |             | yes         |             |              |           |           |                    |             |               |           |               |              |            |                  |                  |          |          |          |          |           |          |             |          |          |
| <i>Sturnira thomasi</i>             | Phyllostomidae   |             | yes         |             |              |           |           |                    |             |               |           |               |              |            |                  |                  |          |          |          |          |           |          |             |          |          |
| <i>Tonatia saurophila</i>           | Phyllostomidae   | yes         |             |             |              |           |           |                    |             |               |           |               |              |            |                  |                  |          |          |          |          |           |          |             |          |          |
| <i>Antrozous pallidus</i>           | Vespertilionidae |             |             |             |              |           |           |                    |             |               |           |               |              |            |                  |                  |          |          |          |          |           |          |             |          |          |
| <i>Eptesicus fuscus</i>             | Vespertilionidae |             |             | extant      |              |           |           | extant             | extant      |               | extant    | extant        | extant       | extant     |                  |                  |          |          |          |          |           |          |             |          | extant   |
| <i>Eptesicus guadeloupensis</i>     | Vespertilionidae |             | yes         |             |              |           |           |                    |             |               |           |               |              |            |                  |                  |          |          |          |          |           |          |             |          |          |
| <i>Lasiurus degelidus</i>           | Vespertilionidae |             | yes         |             |              |           |           |                    |             |               |           |               |              |            |                  |                  |          |          |          |          |           |          |             |          |          |
| <i>Lasiurus insularis</i>           | Vespertilionidae |             | yes         |             |              |           |           |                    |             |               |           |               |              |            |                  |                  |          |          |          |          |           |          |             |          |          |
| <i>Lasiurus intermedius</i>         | Vespertilionidae |             | yes         |             |              |           |           |                    |             |               |           |               |              |            |                  |                  |          |          |          |          |           |          |             |          |          |
| <i>Lasiurus minor</i>               | Vespertilionidae |             | yes         |             |              |           | extant    |                    |             |               |           |               |              |            |                  |                  |          |          |          |          |           |          |             |          |          |
| <i>Lasiurus pfeifferi</i>           | Vespertilionidae |             | yes         |             |              |           |           |                    |             |               |           |               |              |            |                  |                  |          |          |          |          |           |          |             |          |          |
| <i>Myotis cf. M. austroriparius</i> | Vespertilionidae | yes         | yes         | extinct     |              |           |           |                    |             |               |           |               |              |            |                  |                  |          |          |          |          |           |          |             |          |          |
| <i>Myotis dominicensis</i>          | Vespertilionidae |             | yes         |             |              |           |           |                    |             |               |           |               |              |            |                  |                  |          |          |          |          |           |          |             |          |          |
| <i>Myotis martiniquensis</i>        | Vespertilionidae |             | yes         |             |              |           |           |                    |             |               |           |               |              |            |                  |                  |          |          |          |          |           |          |             |          |          |
| <i>Nycticeius cubanus</i>           | Vespertilionidae |             | yes         |             |              |           |           |                    |             |               |           |               |              |            |                  |                  |          |          |          |          |           |          |             |          |          |
| <b>Extant #</b>                     |                  |             |             |             |              |           |           |                    |             |               |           |               |              |            |                  |                  |          |          |          |          |           |          |             |          |          |
| <b>species</b>                      |                  | <b>5</b>    | <b>1</b>    | <b>3</b>    | <b>2</b>     | <b>4</b>  | <b>6</b>  | <b>2</b>           | <b>28</b>   | <b>14</b>     | <b>8</b>  | <b>18</b>     | <b>2</b>     | <b>0</b>   | <b>21</b>        | <b>3</b>         | <b>1</b> | <b>1</b> | <b>3</b> | <b>3</b> | <b>13</b> | <b>6</b> |             |          |          |
| <b>Extinct #</b>                    |                  |             |             |             |              |           |           |                    |             |               |           |               |              |            |                  |                  |          |          |          |          |           |          |             |          |          |
| <b>species</b>                      |                  | <b>8</b>    | <b>0</b>    | <b>0</b>    | <b>0</b>     | <b>0</b>  | <b>4</b>  | <b>0</b>           | <b>8</b>    | <b>3</b>      | <b>4</b>  | <b>3</b>      | <b>4</b>     | <b>0</b>   | <b>3</b>         | <b>0</b>         | <b>0</b> | <b>0</b> | <b>0</b> | <b>0</b> | <b>0</b>  | <b>3</b> | <b>0</b>    | <b>3</b> | <b>0</b> |
| <b>Total</b>                        |                  |             |             |             |              |           |           |                    |             |               |           |               |              |            |                  |                  |          |          |          |          |           |          |             |          |          |
| <b>species</b>                      |                  | <b>13</b>   | <b>1</b>    | <b>3</b>    | <b>2</b>     | <b>4</b>  | <b>10</b> | <b>2</b>           | <b>36</b>   | <b>17</b>     | <b>12</b> | <b>21</b>     | <b>6</b>     | <b>0</b>   | <b>24</b>        | <b>3</b>         | <b>1</b> | <b>1</b> | <b>3</b> | <b>3</b> | <b>16</b> | <b>6</b> |             |          |          |

Supplementary Table 1

| Species                                   | Family         | Endemic to             |             | St. Thomas       | Tortola          | Vieques          | Virgin Gorda     | St. Croix       | Anguilla        | St. Barthelemy  | St. Eustatius   | St. Martin      | Tintamarre      | Antigua         | Barbuda         | Barbados        | Dominica        | Bequia          | Carriacou       | Mustique        | Union           | Guadeloupe      | La Desirade     |  |
|-------------------------------------------|----------------|------------------------|-------------|------------------|------------------|------------------|------------------|-----------------|-----------------|-----------------|-----------------|-----------------|-----------------|-----------------|-----------------|-----------------|-----------------|-----------------|-----------------|-----------------|-----------------|-----------------|-----------------|--|
|                                           |                | Extinct in West Indies | West Indies |                  |                  |                  |                  |                 |                 |                 |                 |                 |                 |                 |                 |                 |                 |                 |                 |                 |                 |                 |                 |  |
|                                           |                |                        |             | Greater Antilles | Greater Antilles | Greater Antilles | Greater Antilles | Lesser Antilles | Lesser Antilles | Lesser Antilles | Lesser Antilles | Lesser Antilles | Lesser Antilles | Lesser Antilles | Lesser Antilles | Lesser Antilles | Lesser Antilles | Lesser Antilles | Lesser Antilles | Lesser Antilles | Lesser Antilles | Lesser Antilles | Lesser Antilles |  |
| <i>Eumops auripendulus</i>                | Molossidae     |                        |             |                  |                  |                  |                  |                 |                 |                 |                 |                 |                 |                 |                 |                 |                 |                 |                 |                 |                 |                 |                 |  |
| <i>Eumops glaucinus</i>                   | Molossidae     |                        |             |                  |                  |                  |                  |                 |                 |                 |                 |                 |                 |                 |                 |                 |                 |                 |                 |                 |                 |                 |                 |  |
| <i>Eumops perotis</i>                     | Molossidae     |                        |             |                  |                  |                  |                  |                 |                 |                 |                 |                 |                 |                 |                 |                 |                 |                 |                 |                 |                 |                 |                 |  |
| <i>Molossus molossus</i>                  | Molossidae     |                        |             | extant           | extant           | extant           | extant           | extant          | extant          | extant          |                 |                 |                 | extant          | extant          | extant          | extant          |                 | extant          |                 | extant          | extant          | extant          |  |
| <i>Mormopterus minutus</i>                | Molossidae     |                        | yes         |                  |                  |                  |                  |                 |                 |                 |                 |                 |                 |                 |                 |                 |                 |                 |                 |                 |                 |                 |                 |  |
| <i>Nyctinomops laticaudatus</i>           | Molossidae     |                        |             |                  |                  |                  |                  |                 |                 |                 |                 |                 |                 |                 |                 |                 |                 |                 |                 |                 |                 |                 |                 |  |
| <i>Nyctinomops macrotis</i>               | Molossidae     |                        |             |                  |                  |                  |                  |                 |                 |                 |                 |                 |                 |                 |                 |                 |                 |                 |                 |                 |                 |                 |                 |  |
| <i>Tadarida brasiliensis</i>              | Molossidae     |                        |             |                  |                  |                  |                  |                 | extant          | extant          | extant          | extant          |                 | extant          | extant          |                 | extant          |                 |                 |                 |                 | extant          | extant          |  |
| <i>Mormoops blainvillei</i>               | Mormoopidae    |                        | yes         |                  |                  |                  |                  |                 | extinct         |                 |                 |                 |                 | extinct         | extinct         |                 |                 |                 |                 |                 |                 |                 |                 |  |
| <i>Mormoops magna</i>                     | Mormoopidae    | yes                    | yes         |                  |                  |                  |                  |                 |                 |                 |                 |                 |                 |                 |                 |                 |                 |                 |                 |                 |                 |                 |                 |  |
| <i>Mormoops megalophylla</i>              | Mormoopidae    | yes                    |             |                  |                  |                  |                  |                 |                 |                 |                 |                 |                 |                 |                 |                 |                 |                 |                 |                 |                 |                 |                 |  |
| <i>Pteronotus davyi</i>                   | Mormoopidae    |                        |             |                  |                  |                  |                  |                 |                 |                 |                 |                 |                 |                 |                 |                 |                 |                 |                 |                 |                 |                 |                 |  |
| <i>Pteronotus macleanii</i>               | Mormoopidae    |                        | yes         |                  |                  |                  |                  |                 |                 |                 |                 |                 |                 |                 |                 |                 |                 |                 |                 |                 |                 |                 |                 |  |
| <i>Pteronotus parnellii parnellii</i>     | Mormoopidae    |                        | yes         |                  |                  |                  |                  |                 |                 |                 |                 |                 |                 |                 |                 |                 |                 |                 |                 |                 |                 |                 |                 |  |
| <i>Pteronotus parnellii portoricensis</i> | Mormoopidae    |                        | yes         |                  |                  |                  |                  |                 |                 |                 |                 |                 |                 | extinct         |                 |                 |                 |                 |                 |                 |                 |                 |                 |  |
| <i>Pteronotus parnellii pusillus</i>      | Mormoopidae    |                        | yes         |                  |                  |                  |                  |                 |                 |                 |                 |                 |                 |                 |                 |                 |                 |                 |                 |                 |                 |                 |                 |  |
| <i>Pteronotus parnellii rubiginosus</i>   | Mormoopidae    |                        |             |                  |                  |                  |                  |                 |                 |                 |                 |                 |                 |                 |                 |                 |                 |                 |                 |                 |                 |                 |                 |  |
| <i>Pteronotus pristinus</i>               | Mormoopidae    | yes                    | yes         |                  |                  |                  |                  |                 |                 |                 |                 |                 |                 |                 |                 |                 |                 |                 |                 |                 |                 |                 |                 |  |
| <i>Pteronotus quadridens</i>              | Mormoopidae    |                        | yes         |                  |                  |                  |                  |                 |                 |                 |                 |                 |                 |                 |                 |                 |                 |                 |                 |                 |                 |                 |                 |  |
| <i>Pteronotus sp. nov.</i>                | Mormoopidae    | yes                    | yes         |                  |                  |                  |                  |                 |                 |                 |                 |                 |                 |                 |                 |                 |                 |                 |                 |                 |                 |                 |                 |  |
| <i>Chilonatalus micropus macer</i>        | Natalidae      |                        | yes         |                  |                  |                  |                  |                 |                 |                 |                 |                 |                 |                 |                 |                 |                 |                 |                 |                 |                 |                 |                 |  |
| <i>Chilonatalus micropus micropus</i>     | Natalidae      |                        | yes         |                  |                  |                  |                  |                 |                 |                 |                 |                 |                 |                 |                 |                 |                 |                 |                 |                 |                 |                 |                 |  |
| <i>Chilonatalus tumidifrons</i>           | Natalidae      |                        | yes         |                  |                  |                  |                  |                 |                 |                 |                 |                 |                 |                 |                 |                 |                 |                 |                 |                 |                 |                 |                 |  |
| <i>Natalus jamaicensis</i>                | Natalidae      |                        | yes         |                  |                  |                  |                  |                 |                 |                 |                 |                 |                 |                 |                 |                 |                 |                 |                 |                 |                 |                 |                 |  |
| <i>Natalus major</i>                      | Natalidae      |                        | yes         |                  |                  |                  |                  |                 |                 |                 |                 |                 |                 |                 |                 |                 |                 |                 |                 |                 |                 |                 |                 |  |
| <i>Natalus primus</i>                     | Natalidae      | yes                    | yes         |                  |                  |                  |                  |                 |                 |                 |                 |                 |                 |                 |                 |                 |                 |                 |                 |                 |                 |                 |                 |  |
| <i>Natalus stramineus</i>                 | Natalidae      |                        | yes         |                  |                  |                  |                  | extant          |                 |                 | extant          |                 |                 | extant          | extant          |                 | extant          |                 |                 |                 |                 | extant          |                 |  |
| <i>Nyctiellus lepidus</i>                 | Natalidae      |                        | yes         |                  |                  |                  |                  |                 |                 |                 |                 |                 |                 |                 |                 |                 |                 |                 |                 |                 |                 |                 |                 |  |
| <i>Noctilio leporinus</i>                 | Noctilionidae  |                        |             | extant           |                  | extant           |                  | extant          |                 |                 | extant          |                 |                 | extant          | extant          | extant          | extant          | extant          |                 | extant          |                 | extant          |                 |  |
| <i>Ardops nichollsi</i>                   | Phyllostomidae |                        | yes         |                  |                  |                  |                  |                 |                 |                 | extant          |                 |                 | extant          | extant          | extant          | extant          | extant          |                 |                 |                 | extant          |                 |  |
| <i>Artibeus flavescens</i>                | Phyllostomidae |                        | yes         |                  |                  |                  |                  |                 |                 |                 |                 |                 |                 |                 |                 |                 |                 |                 |                 |                 |                 |                 | extant          |  |
| <i>Artibeus thomasi</i>                   | Phyllostomidae | yes                    | yes         |                  |                  |                  |                  |                 |                 |                 |                 |                 |                 |                 |                 |                 |                 |                 |                 |                 |                 |                 |                 |  |
| <i>Artibeus jamaicensis</i>               | Phyllostomidae |                        |             | extant           | extant           | extant           | extant           | extant          | extant          | extant          | extant          | extant          |                 | extant          | extant          | extant          | extant          | extant          | extant          | extant          | extant          | extant          | extant          |  |
| <i>Artibeus lituratus</i>                 | Phyllostomidae |                        |             |                  |                  |                  |                  |                 |                 |                 |                 |                 |                 |                 |                 |                 |                 |                 |                 |                 |                 |                 |                 |  |
| <i>Artibeus planirostris</i>              | Phyllostomidae |                        |             |                  |                  |                  |                  |                 |                 |                 |                 |                 |                 |                 |                 |                 |                 |                 |                 |                 |                 |                 |                 |  |
| <i>Artibeus schwartzi</i>                 | Phyllostomidae |                        | yes         |                  |                  |                  |                  |                 |                 |                 |                 |                 |                 |                 |                 |                 | extant          |                 |                 |                 |                 |                 |                 |  |
| <i>Brachyphylla cavernarum</i>            | Phyllostomidae |                        | yes         | extant           |                  |                  |                  | extant          | extant          | extant          | extant          | extant          |                 | extant          | extant          | extant          | extant          |                 |                 |                 |                 | extant          | extant          |  |
| <i>Brachyphylla nana nana</i>             | Phyllostomidae |                        | yes         |                  |                  |                  |                  |                 |                 |                 |                 |                 |                 |                 |                 |                 |                 |                 |                 |                 |                 |                 |                 |  |
| <i>Brachyphylla nana pumila</i>           | Phyllostomidae |                        | yes         |                  |                  |                  |                  |                 |                 |                 |                 |                 |                 |                 |                 |                 |                 |                 |                 |                 |                 |                 |                 |  |
| <i>Chiroderma improvisum</i>              | Phyllostomidae |                        | yes         |                  |                  |                  |                  |                 |                 |                 |                 |                 |                 |                 |                 |                 |                 |                 |                 |                 |                 |                 | extant          |  |
| <i>Cubanycteris silvai</i>                | Phyllostomidae | yes                    | yes         |                  |                  |                  |                  |                 |                 |                 |                 |                 |                 |                 |                 |                 |                 |                 |                 |                 |                 |                 |                 |  |
| <i>Desmodus puntajudensis</i>             | Phyllostomidae | yes                    | yes         |                  |                  |                  |                  |                 |                 |                 |                 |                 |                 |                 |                 |                 |                 |                 |                 |                 |                 |                 |                 |  |
| <i>Erophylla bomifrons</i>                | Phyllostomidae |                        | yes         |                  |                  |                  |                  |                 |                 |                 |                 |                 |                 |                 |                 |                 |                 |                 |                 |                 |                 |                 |                 |  |
| <i>Erophylla sezekorni</i>                | Phyllostomidae |                        | yes         |                  |                  |                  |                  |                 |                 |                 |                 |                 |                 |                 |                 |                 |                 |                 |                 |                 |                 |                 |                 |  |
| <i>Glossophaga longirostris</i>           | Phyllostomidae |                        |             |                  |                  |                  |                  |                 |                 |                 |                 |                 |                 |                 |                 |                 |                 |                 |                 | extant          |                 | extant          |                 |  |
| <i>Glossophaga soricina</i>               | Phyllostomidae |                        |             |                  |                  |                  |                  |                 |                 |                 |                 |                 |                 |                 |                 |                 |                 |                 |                 |                 |                 |                 |                 |  |
| <i>Macrotus waterhousii</i>               | Phyllostomidae |                        | yes         |                  |                  |                  |                  |                 | extinct         |                 |                 |                 |                 |                 |                 |                 |                 |                 |                 |                 |                 |                 |                 |  |
| <i>Monophyllus plethodon</i>              | Phyllostomidae |                        | yes         |                  |                  |                  |                  |                 | extant          | extant          |                 | extant          |                 | extant          | extant          | extant          | extant          |                 |                 |                 |                 | extant          |                 |  |
| <i>Monophyllus redmani</i>                | Phyllostomidae |                        | yes         |                  |                  |                  |                  |                 |                 |                 |                 |                 |                 |                 |                 |                 |                 |                 |                 |                 |                 |                 |                 |  |
| <i>Phyllonycteris aphylla</i>             | Phyllostomidae |                        | yes         |                  |                  |                  |                  |                 |                 |                 |                 |                 |                 |                 |                 |                 |                 |                 |                 |                 |                 |                 |                 |  |
| <i>Phyllonycteris major</i>               | Phyllostomidae | yes                    | yes         |                  |                  |                  |                  |                 |                 |                 |                 |                 |                 |                 |                 |                 |                 |                 |                 |                 |                 |                 |                 |  |
| <i>Phyllonycteris poeyi</i>               | Phyllostomidae |                        | yes         |                  |                  |                  |                  |                 |                 |                 |                 |                 |                 |                 |                 |                 |                 |                 |                 |                 |                 |                 |                 |  |
| <i>Phyllops falcatus</i>                  | Phyllostomidae |                        | yes         |                  |                  |                  |                  |                 |                 |                 |                 |                 |                 |                 |                 |                 |                 |                 |                 |                 |                 |                 |                 |  |
| <i>Phyllops silvai</i>                    | Phyllostomidae | yes                    | yes         |                  |                  |                  |                  |                 |                 |                 |                 |                 |                 |                 |                 |                 |                 |                 |                 |                 |                 |                 |                 |  |
| <i>Phyllops vetus</i>                     | Phyllostomidae | yes                    | yes         |                  |                  |                  |                  |                 |                 |                 |                 |                 |                 |                 |                 |                 |                 |                 |                 |                 |                 |                 |                 |  |
| <i>Stenoderma rufum</i>                   | Phyllostomidae |                        | yes         | extant           |                  | extant           |                  | extant          |                 |                 |                 |                 |                 |                 |                 |                 |                 |                 |                 |                 |                 |                 |                 |  |

Supplementary Table 1

| Species                             | Family           | Endemic to  |             | St. Thomas | Tortola          | Vieques          | Virgin Gorda     | St. Croix        | Anguilla        | St. Barthelemy  | St. Eustatius   | St. Martin      | Tintamarre      | Antigua         | Barbuda         | Barbados        | Dominica        | Bequia          | Carriacou       | Mustique        | Union           | Guadeloupe      | La Desirade     |          |
|-------------------------------------|------------------|-------------|-------------|------------|------------------|------------------|------------------|------------------|-----------------|-----------------|-----------------|-----------------|-----------------|-----------------|-----------------|-----------------|-----------------|-----------------|-----------------|-----------------|-----------------|-----------------|-----------------|----------|
|                                     |                  | West Indies | West Indies |            |                  |                  |                  |                  |                 |                 |                 |                 |                 |                 |                 |                 |                 |                 |                 |                 |                 |                 |                 |          |
|                                     |                  |             |             |            | Greater Antilles | Greater Antilles | Greater Antilles | Greater Antilles | Lesser Antilles | Lesser Antilles | Lesser Antilles | Lesser Antilles | Lesser Antilles | Lesser Antilles | Lesser Antilles | Lesser Antilles | Lesser Antilles | Lesser Antilles | Lesser Antilles | Lesser Antilles | Lesser Antilles | Lesser Antilles | Lesser Antilles |          |
| <i>Sturnira lilium</i>              | Phyllostomidae   |             |             |            |                  |                  |                  |                  |                 |                 |                 |                 |                 |                 |                 |                 |                 |                 |                 |                 |                 |                 |                 | extant   |
| <i>Sturnira thomasi</i>             | Phyllostomidae   |             | yes         |            |                  |                  |                  |                  |                 |                 |                 |                 |                 |                 |                 |                 |                 |                 |                 |                 |                 |                 |                 | extant   |
| <i>Tonatia saurophila</i>           | Phyllostomidae   | yes         |             |            |                  |                  |                  |                  |                 |                 |                 |                 |                 |                 |                 |                 |                 |                 |                 |                 |                 |                 |                 |          |
| <i>Antrozous pallidus</i>           | Vespertilionidae |             |             |            |                  |                  |                  |                  |                 |                 |                 |                 |                 |                 |                 |                 |                 |                 |                 |                 |                 |                 |                 |          |
| <i>Eptesicus fuscus</i>             | Vespertilionidae |             |             |            |                  |                  |                  |                  |                 |                 |                 |                 |                 |                 |                 |                 |                 |                 |                 |                 |                 |                 |                 | extant   |
| <i>Eptesicus guadeloupensis</i>     | Vespertilionidae |             | yes         |            |                  |                  |                  |                  |                 |                 |                 |                 |                 |                 |                 |                 |                 |                 |                 |                 |                 |                 |                 | extant   |
| <i>Lasiurus degelidus</i>           | Vespertilionidae |             | yes         |            |                  |                  |                  |                  |                 |                 |                 |                 |                 |                 |                 |                 |                 |                 |                 |                 |                 |                 |                 |          |
| <i>Lasiurus insularis</i>           | Vespertilionidae |             | yes         |            |                  |                  |                  |                  |                 |                 |                 |                 |                 |                 |                 |                 |                 |                 |                 |                 |                 |                 |                 |          |
| <i>Lasiurus intermedius</i>         | Vespertilionidae |             | yes         |            |                  |                  |                  |                  |                 |                 |                 |                 |                 |                 |                 |                 |                 |                 |                 |                 |                 |                 |                 |          |
| <i>Lasiurus minor</i>               | Vespertilionidae |             | yes         |            |                  |                  |                  |                  |                 |                 |                 |                 |                 |                 |                 |                 |                 |                 |                 |                 |                 |                 |                 |          |
| <i>Lasiurus pfeifferi</i>           | Vespertilionidae |             | yes         |            |                  |                  |                  |                  |                 |                 |                 |                 |                 |                 |                 |                 |                 |                 |                 |                 |                 |                 |                 |          |
| <i>Myotis cf. M. austroriparius</i> | Vespertilionidae | yes         | yes         |            |                  |                  |                  |                  |                 |                 |                 |                 |                 |                 |                 |                 |                 |                 |                 |                 |                 |                 |                 |          |
| <i>Myotis dominicensis</i>          | Vespertilionidae |             | yes         |            |                  |                  |                  |                  |                 |                 |                 |                 |                 |                 |                 |                 |                 |                 |                 |                 |                 |                 |                 | extant   |
| <i>Myotis martiniquensis</i>        | Vespertilionidae |             | yes         |            |                  |                  |                  |                  |                 |                 |                 |                 |                 |                 |                 |                 |                 |                 |                 |                 |                 |                 |                 |          |
| <i>Nycticeius cubanus</i>           | Vespertilionidae |             | yes         |            |                  |                  |                  |                  |                 |                 |                 |                 |                 |                 |                 |                 |                 |                 |                 |                 |                 |                 |                 | extant   |
| <b>Extant #</b>                     |                  |             |             |            |                  |                  |                  |                  |                 |                 |                 |                 |                 |                 |                 |                 |                 |                 |                 |                 |                 |                 |                 |          |
| <b>species</b>                      |                  | <b>5</b>    | <b>2</b>    | <b>4</b>   | <b>2</b>         | <b>5</b>         | <b>6</b>         | <b>5</b>         | <b>5</b>        | <b>8</b>        | <b>0</b>        | <b>7</b>        | <b>7</b>        | <b>7</b>        | <b>12</b>       | <b>1</b>        | <b>4</b>        | <b>1</b>        | <b>3</b>        | <b>12</b>       | <b>4</b>        |                 |                 |          |
| <b>Extinct #</b>                    |                  |             |             |            |                  |                  |                  |                  |                 |                 |                 |                 |                 |                 |                 |                 |                 |                 |                 |                 |                 |                 |                 |          |
| <b>species</b>                      |                  | <b>0</b>    | <b>0</b>    | <b>0</b>   | <b>0</b>         | <b>0</b>         | <b>2</b>         | <b>0</b>         | <b>0</b>        | <b>0</b>        | <b>0</b>        | <b>2</b>        | <b>1</b>        | <b>0</b>        | <b>0</b>        | <b>0</b>        | <b>0</b>        | <b>0</b>        | <b>0</b>        | <b>0</b>        | <b>0</b>        | <b>0</b>        | <b>0</b>        | <b>0</b> |
| <b>Total</b>                        |                  |             |             |            |                  |                  |                  |                  |                 |                 |                 |                 |                 |                 |                 |                 |                 |                 |                 |                 |                 |                 |                 |          |
| <b>species</b>                      |                  | <b>5</b>    | <b>2</b>    | <b>4</b>   | <b>2</b>         | <b>5</b>         | <b>8</b>         | <b>5</b>         | <b>5</b>        | <b>8</b>        | <b>0</b>        | <b>9</b>        | <b>8</b>        | <b>7</b>        | <b>12</b>       | <b>1</b>        | <b>4</b>        | <b>1</b>        | <b>3</b>        | <b>12</b>       | <b>4</b>        |                 |                 |          |
